# Supplementary material for: Reprogramming Cancer into Antigen-Presenting Cells as a Novel Immunotherapy
Source: Oxford University Press journal article supplement (doi:10.1158/2159-8290.cd-21-0502), 2023-03-01
Supplement: cd-21-0502_supplemental_figure_s3_suppsf3.pdf [file cd-21-0502_supplemental_figure_s3_suppsf3.pdf]

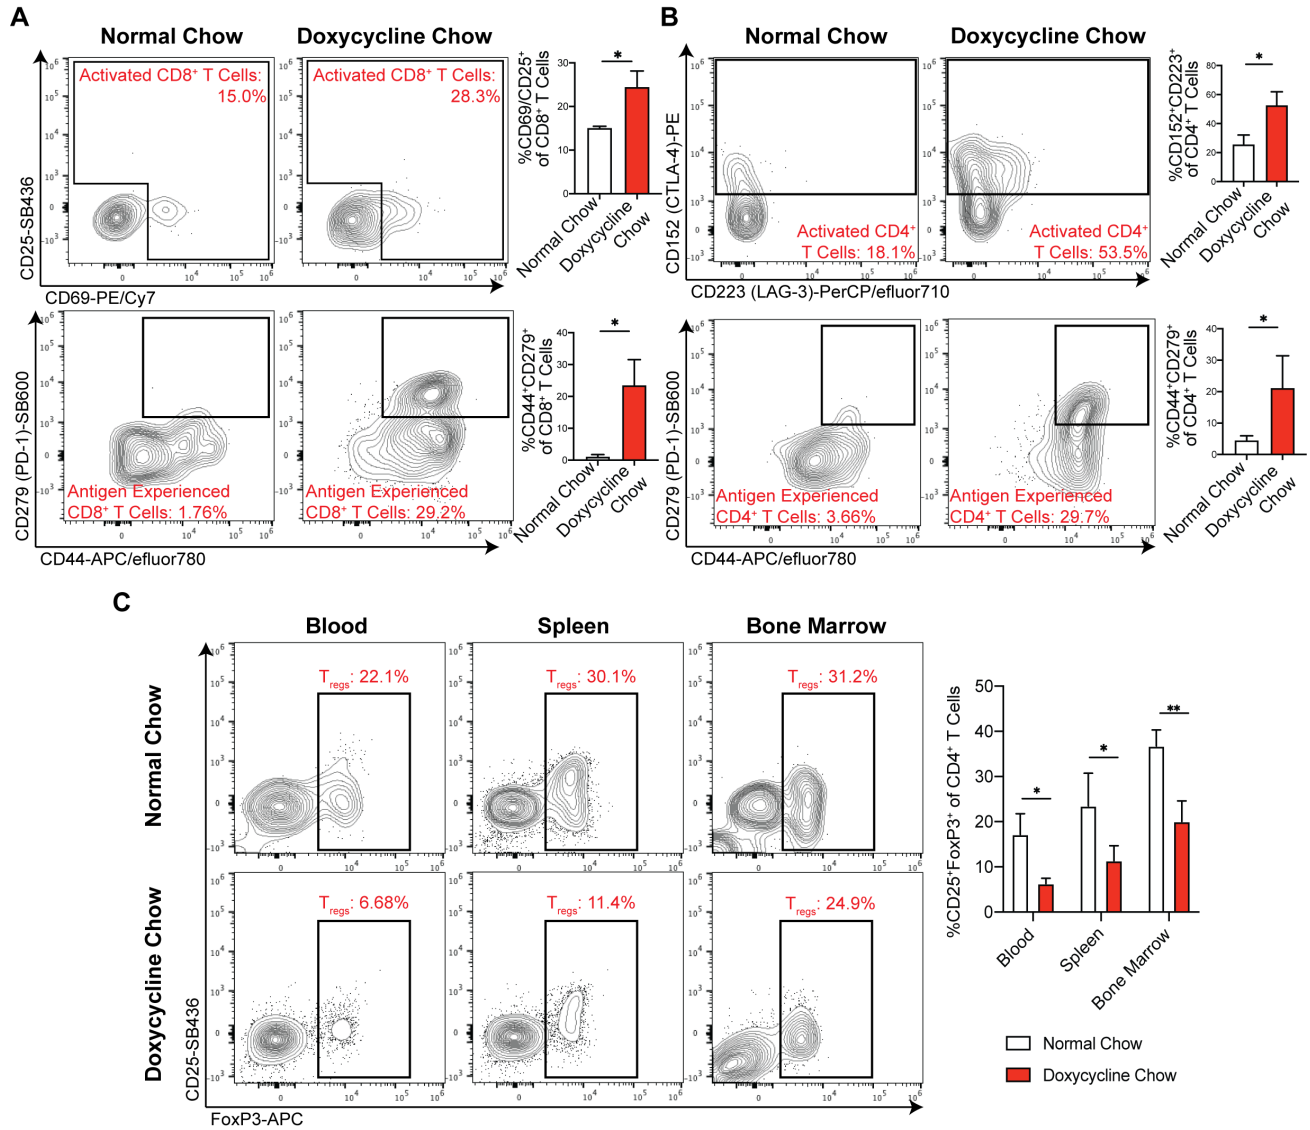

**Supplemental Figure S3: In vivo TR-APC induction results in expansion of activated and memory T cells, and decreased frequency of T<sub>regs</sub>.** A-B, Representative flow cytometry of CD8<sup>+</sup> (A) and CD4<sup>+</sup> (B) T cells in the bone marrow of BALB/c mice 7 days following engraftment of RAW-112 tumor cells on normal or doxycycline chow. Gated T cell populations shown as the frequency of single, live CD3<sup>+</sup> CD4<sup>+</sup>/CD8<sup>+</sup> T cells. Data displayed as mean ± S.D. n=3 mice/group. *P* values were calculated with two-tailed t-tests. \**P* ≤ 0.05. C, Representative flow cytometry of systemic T<sub>reg</sub> frequency in the peripheral blood, spleen, and bone marrow of BALB/c mice 14 days following engraftment of RAW-112 tumor cells. T<sub>reg</sub> gate shown as a frequency of

single, live, CD3<sup>+</sup>CD4<sup>+</sup> T cells. Data displayed as mean  $\pm$  S.D. n=3 mice/group. *P* values were calculated with one way ANOVA with Sidak's multiple comparison test. \*\**P*<sub>adj</sub>  $\leq$  0.01, \**P*<sub>adj</sub>  $\leq$  0.05.
